# Supplementary material for: Understanding the constant-voltage fast-charging process using a high-rate Ni-rich cathode material for lithium-ion batteries
Source: Royal Society of Chemistry journal article supplement (doi:10.1039/d1ta05767g), 2021-12-13
Supplement: d1ta05767g1.pdf [file d1ta05767g1.pdf]

**Supporting information**

**Understanding on the constant-voltage fast charging process using  
a high-rate Ni-rich cathode material for lithium ion battery**

Kyojin Ku<sup>1,2,\*</sup>, Seoung-Bum Son<sup>3</sup>, Jihyeon Gim<sup>3</sup>, Jehee Park<sup>3</sup>, Yujia Liang<sup>1</sup>, Anthony Stark<sup>1</sup>,  
Eungje Lee<sup>3</sup>, Joseph Libera<sup>1,\*</sup>

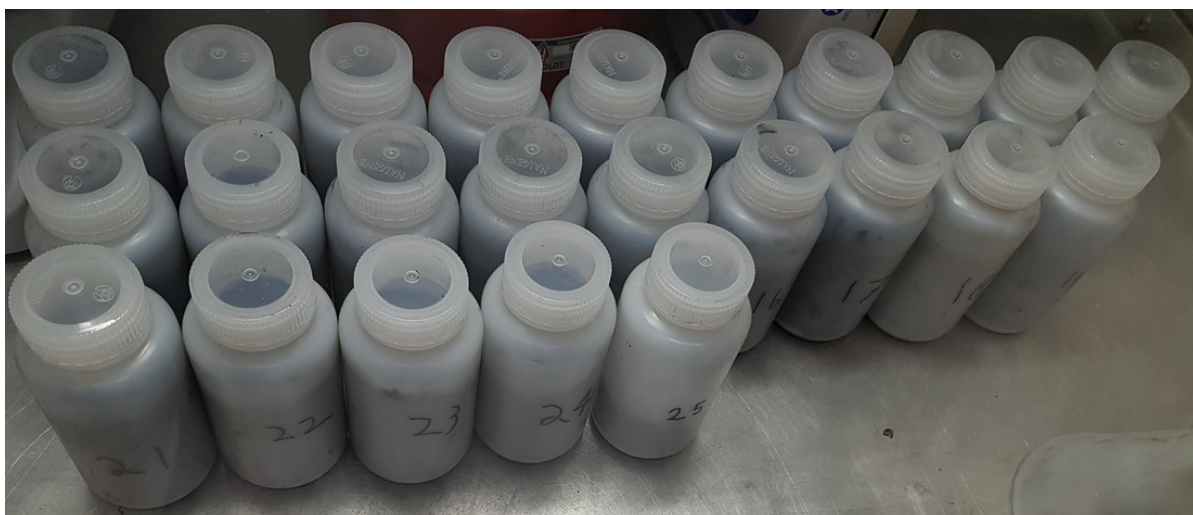

**Figure S1.** Annealed NCM811 powders acquired from 5 kg of USP precursors.

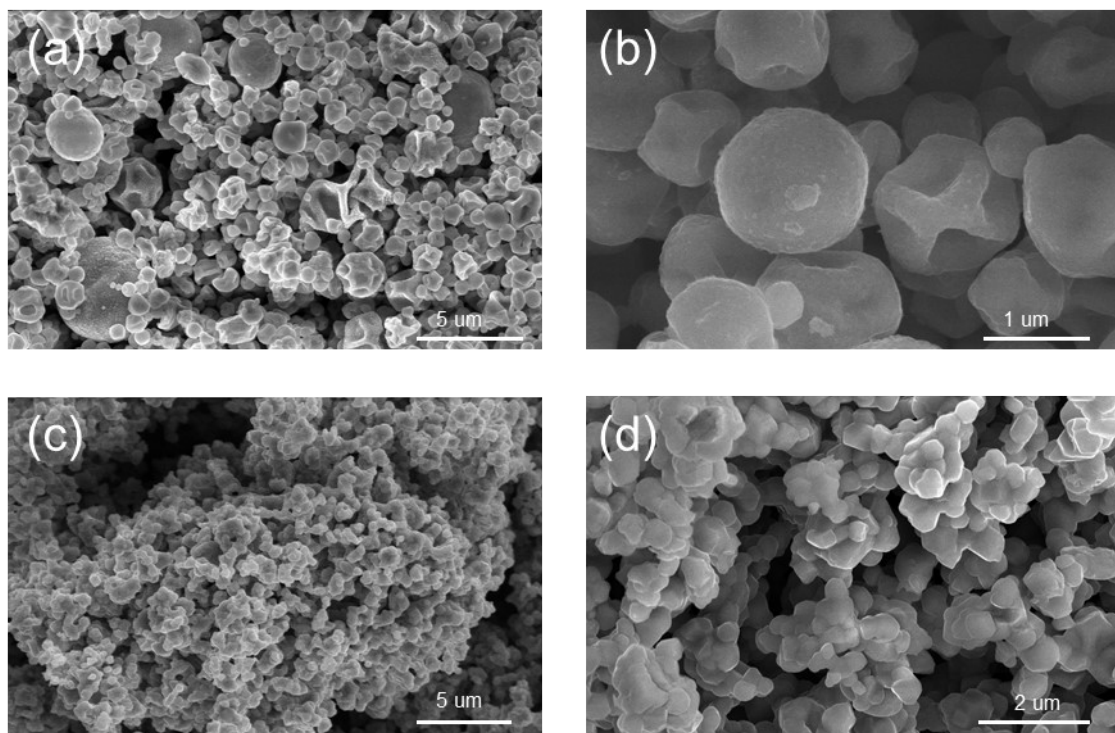

**Figure S2.** SEM images of (a,b) USP precursor and (c,d) annealed powders.

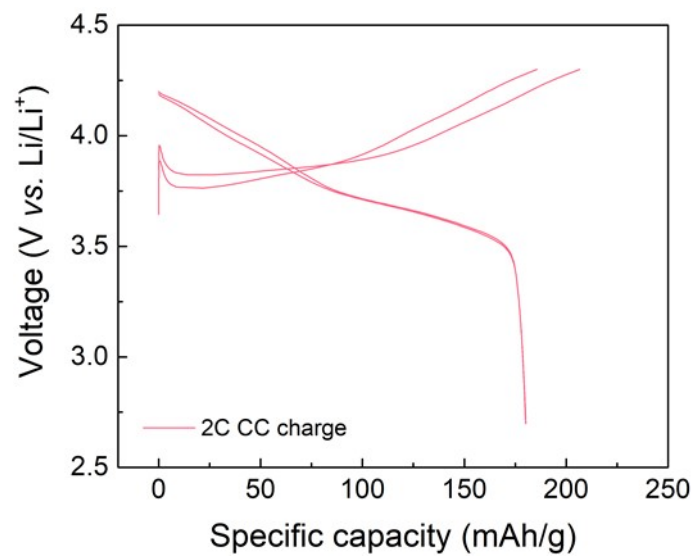

**Figure S3.** Voltage profile of NCM811 under 2C CC charging protocol.

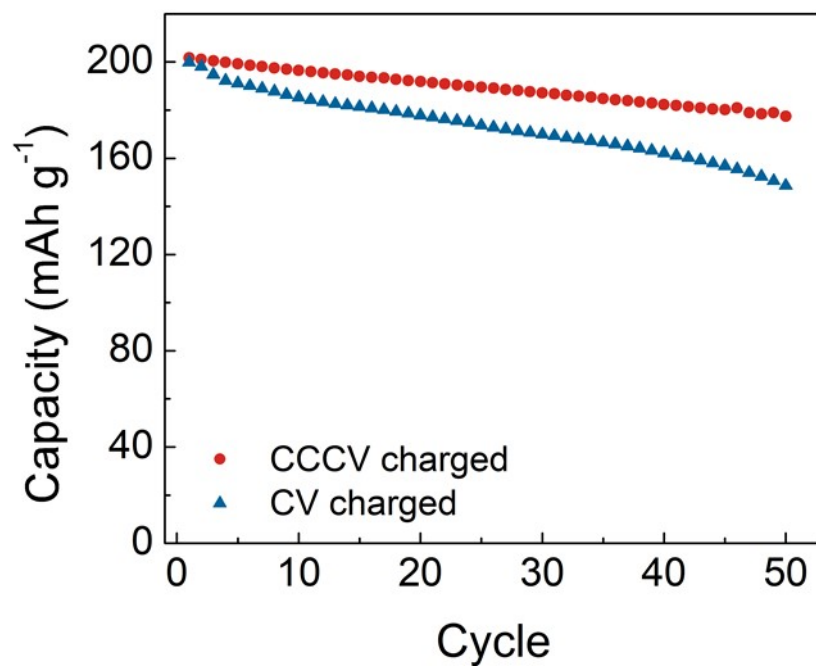

**Figure S4.** Cycle stability of CCCV (red) and CV (blue) charged cells.

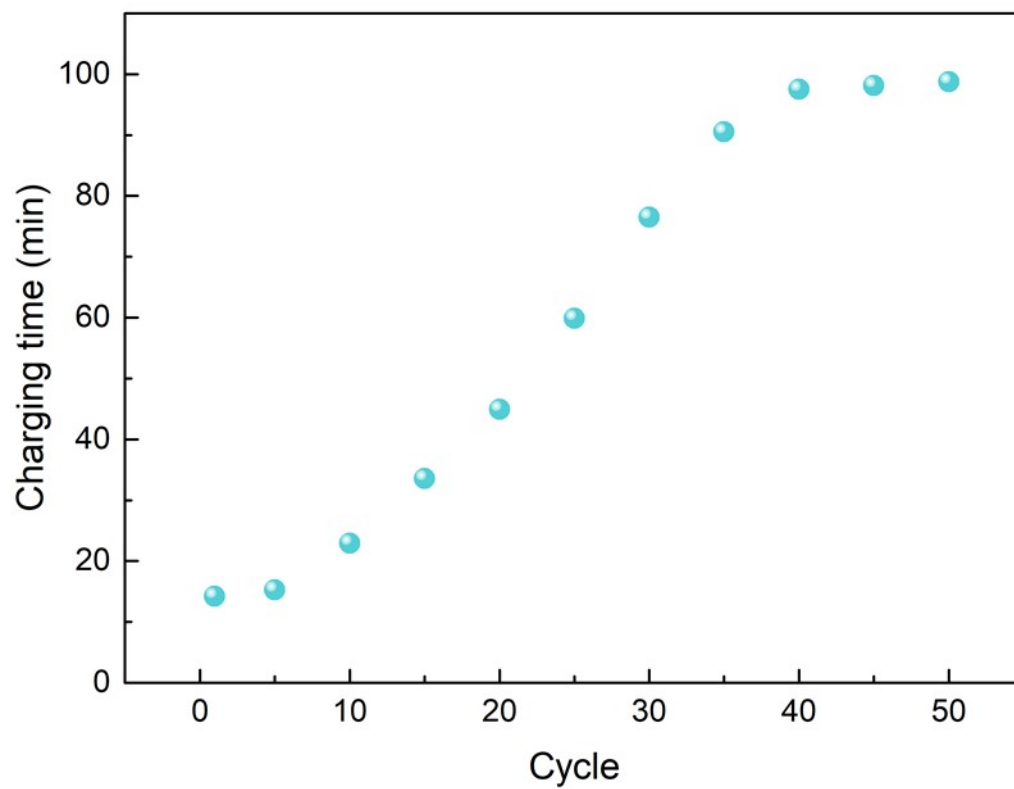

**Figure S5.** Charging time with every 5 cycles using CV charging protocol.

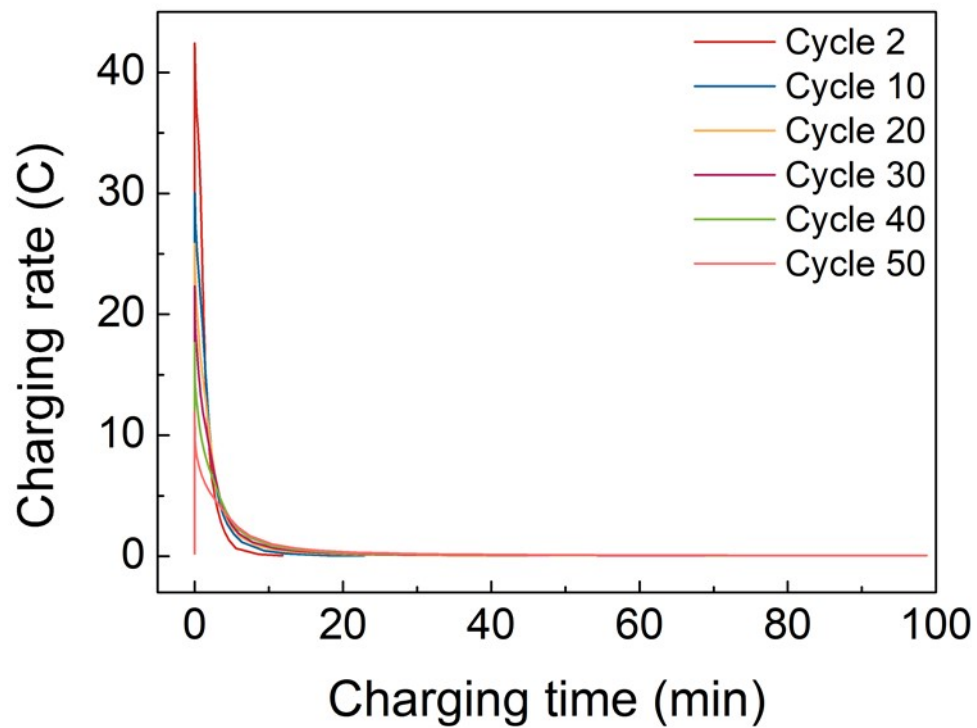

**Figure S6.** Charging rate profile of CV charging with every 10 cycles. Magnified image during initial 10 minutes is illustrated in Figure 4b.

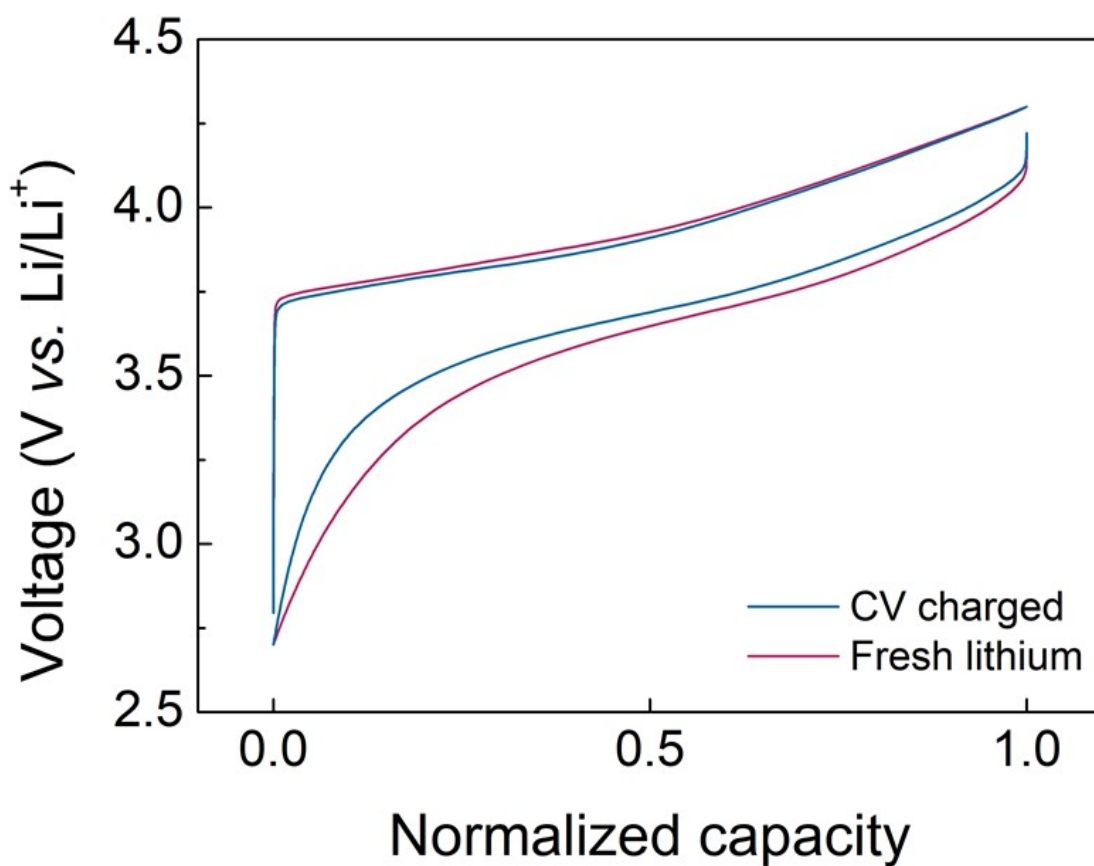

**Figure S7.** Voltage profile with normalized capacity after 50 cycles of CV charging (blue). After 50 CV charging cycling and re-assembling with new lithium metal and electrolyte (red), there was no improvement in voltage hysteresis, indicating the origin of voltage hysteresis is the cathode electrode.



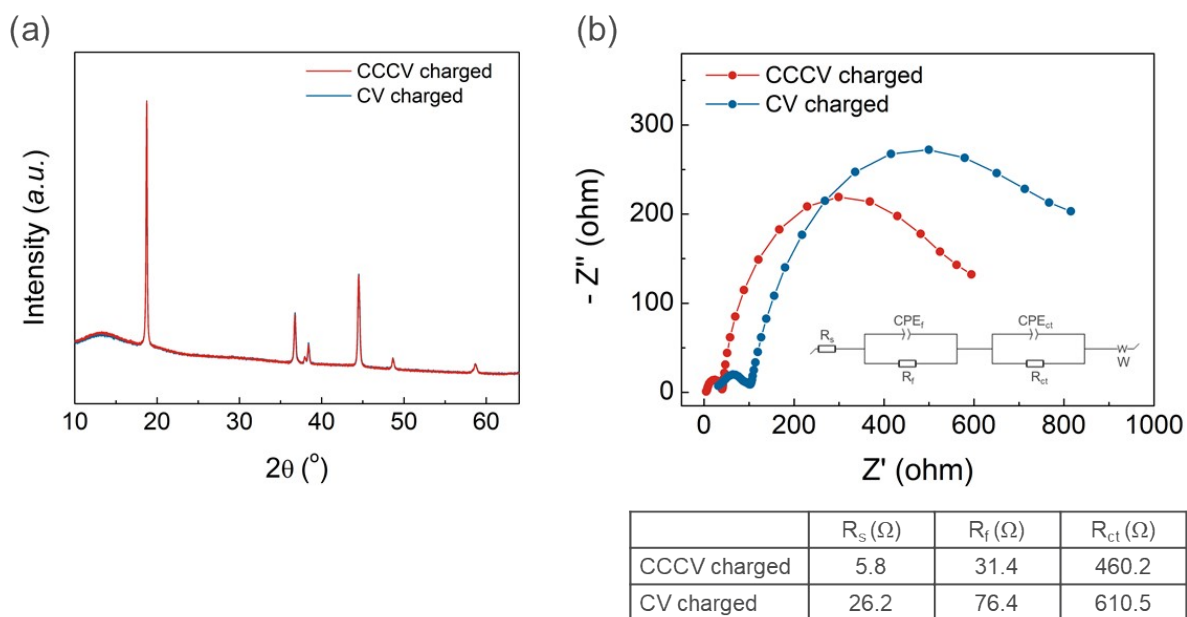

**Figure S8.** (a) XRD and (b) EIS data after 50 cycles of CCCV charging (red) and CV charging (blue).  $a$  and  $c$  lattice parameters for CCCV cycled were 2.86952(9) Å and 14.2327(13) Å, and for CV cycled were 2.86954(9) Å and 14.2330(13) Å. Equivalent circuit for EIS fitting is shown in the inset of Figure S8b. ( $R_s$ ; ohmic resistance,  $R_f$ ; SEI film resistance,  $R_{ct}$ ; charge transfer resistance and  $W$ ; Warburg impedance.)

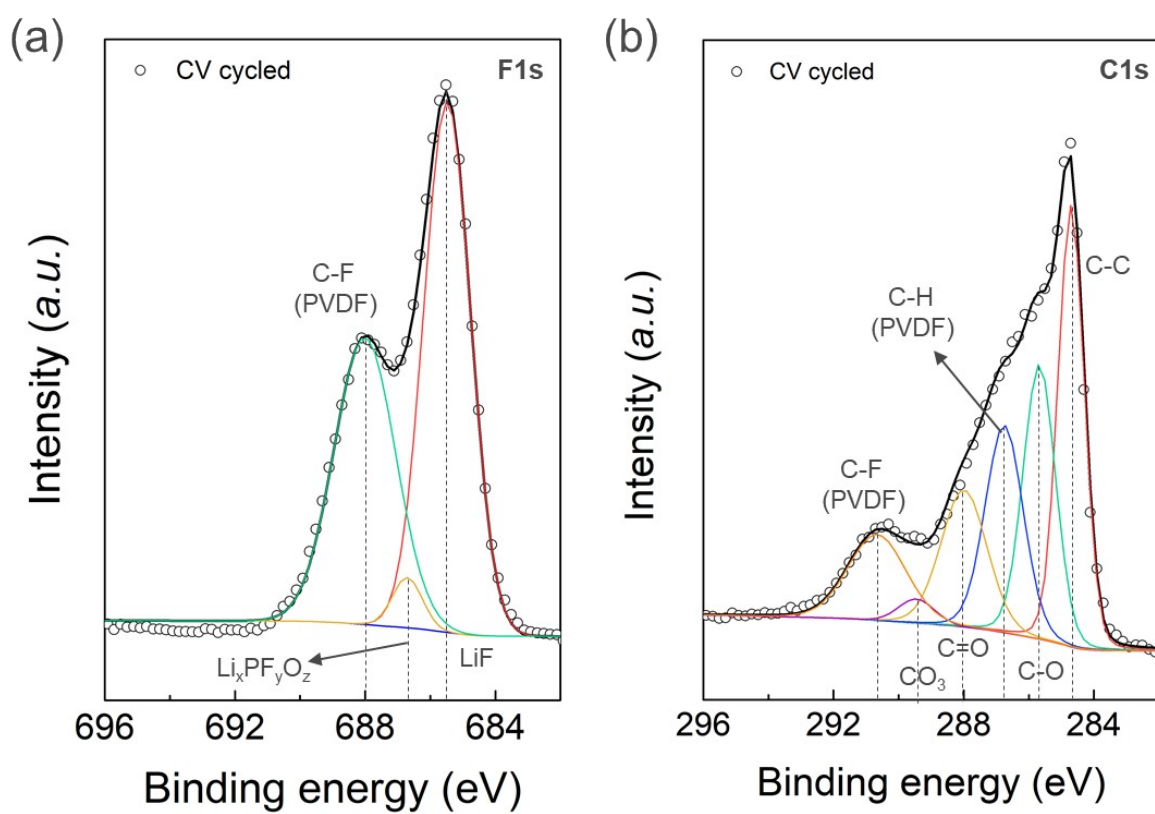

**Figure S9.** XPS spectra of (a) F1s and (b) C1s regions from CV cycled electrode with peak deconvolution.

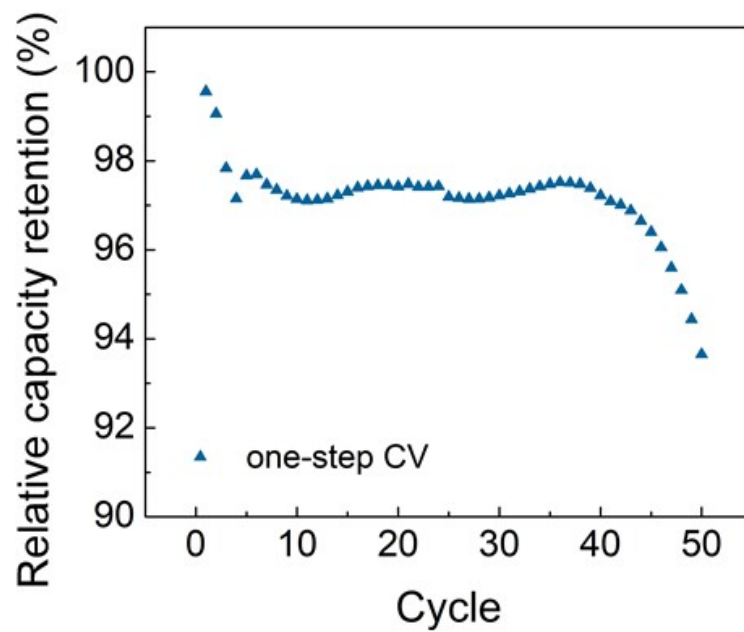

**Figure S10.** Relative capacity retention of one-step CV charging. Discharge capacity of one-step CV charging was normalized by two-step CV charging, which was acquired from the data in Figure 6c.

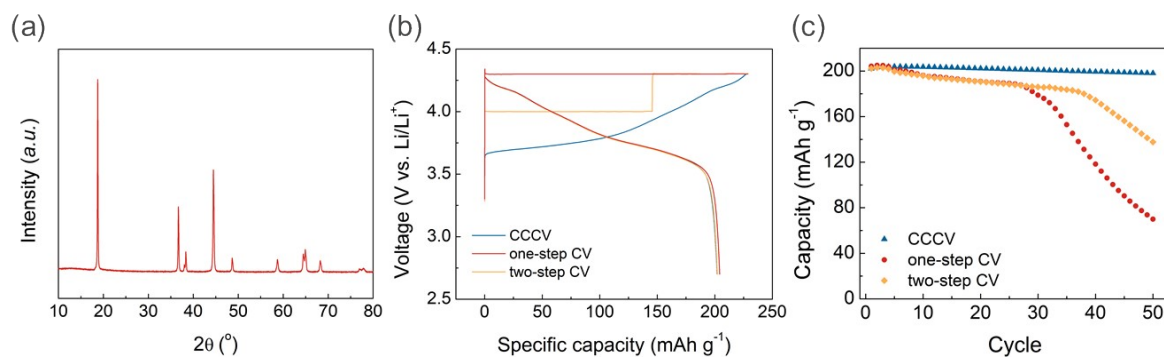

**Figure S11.** (a) XRD data of NCM811 obtained from co-precipitation method. (b) Voltage profile and (c) cycle stability of CCCV charging (blue), one-step CV charging (red) and two-step CV charging (orange).
